# Supplementary material for: RNA Sequence Analysis of Differentially Expressed Genes in Left Atrial Appendage Thrombus
Source: Research Square preprint supplement (doi:10.21203/rs.3.rs-6680046/v1), 2025-06-09
Supplement: Supplementary file 1 [file 155510882924a161af3e31d4.xlsx]

## Sheet: Sheet1
Supplemental Table 3. RNA-seq data
Samples	RIN	Total Raw Reads (×106)	Total Clena Reads (×106)	Total Clean Bases (×106)	Clean Reads Q20 (%)	Clean Reads Q30 (%)	Clean Reads Ratio (%)
LAAT1	6.5	49.08	44.71	6.71	96.16	90.55	91.1
LAAT2	7.2	50.52	46.35	6.95	96.5	91.28	91.74
LAAT3	6.8	49.02	44.68	6.7	96.19	90.62	91.15
LAAT4	7.6	47.33	43.99	6.6	95.97	90.06	92.94
LAAT5	6.3	47.85	43.23	6.38	96.48	91.29	90.35
LAAT6	7.4	47.82	43.84	6.58	96.38	91.01	91.68
without LAAT1	7.3	49.08	44.76	6.71	96.29	90.81	91.19
without LAAT2	7.1	49.46	44.36	6.65	96.45	91.22	89.68
without LAAT3	7.4	49.4	44.69	6.7	96.71	91.88	90.46
without LAAT4	7.8	49.08	45.11	6.77	96.14	90.47	91.91
without LAAT5	7.3	47.25	43.44	6.52	96.18	90.53	91.93
RNA-seq: RNA sequence, LAAT: left atrial appendage thrombus, RIN: RNA integrity number
