# Supplementary material for: RNA Sequence Analysis of Differentially Expressed Genes in Left Atrial Appendage Thrombus
Source: Research Square preprint supplement (doi:10.21203/rs.3.rs-6680046/v1), 2025-06-09
Supplement: Supplementary file 1 [file b63f7580ee3d16efce2de7b8.pdf]

(a) Cell type distribution from Heart cell atlas (<https://www.heartcellatlas.org/>)

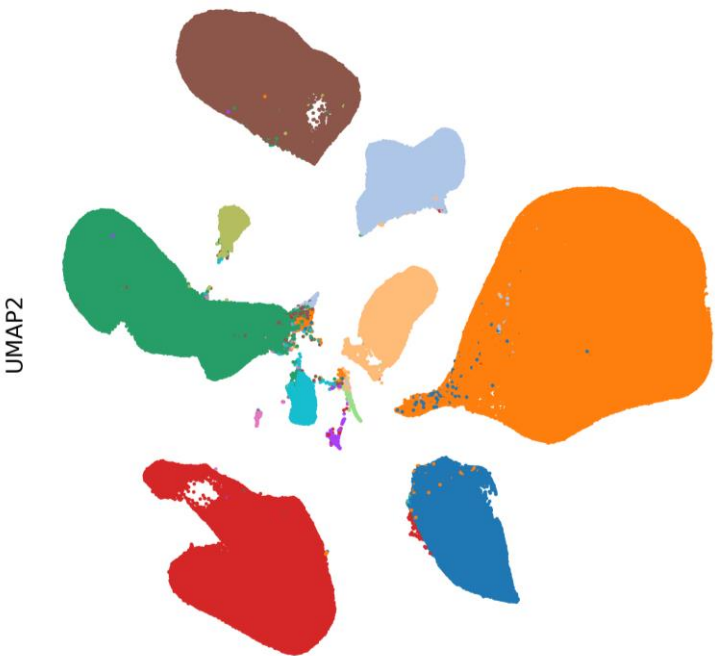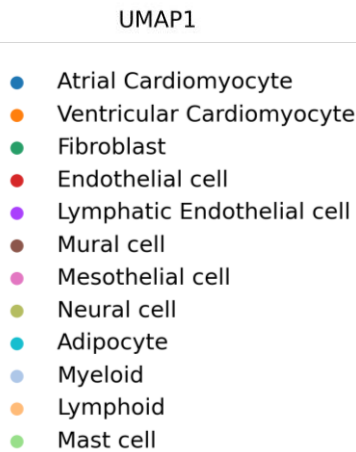

(b) The expression of candidate DEGs from Heart cell atlas (<https://www.heartcellatlas.org/>)

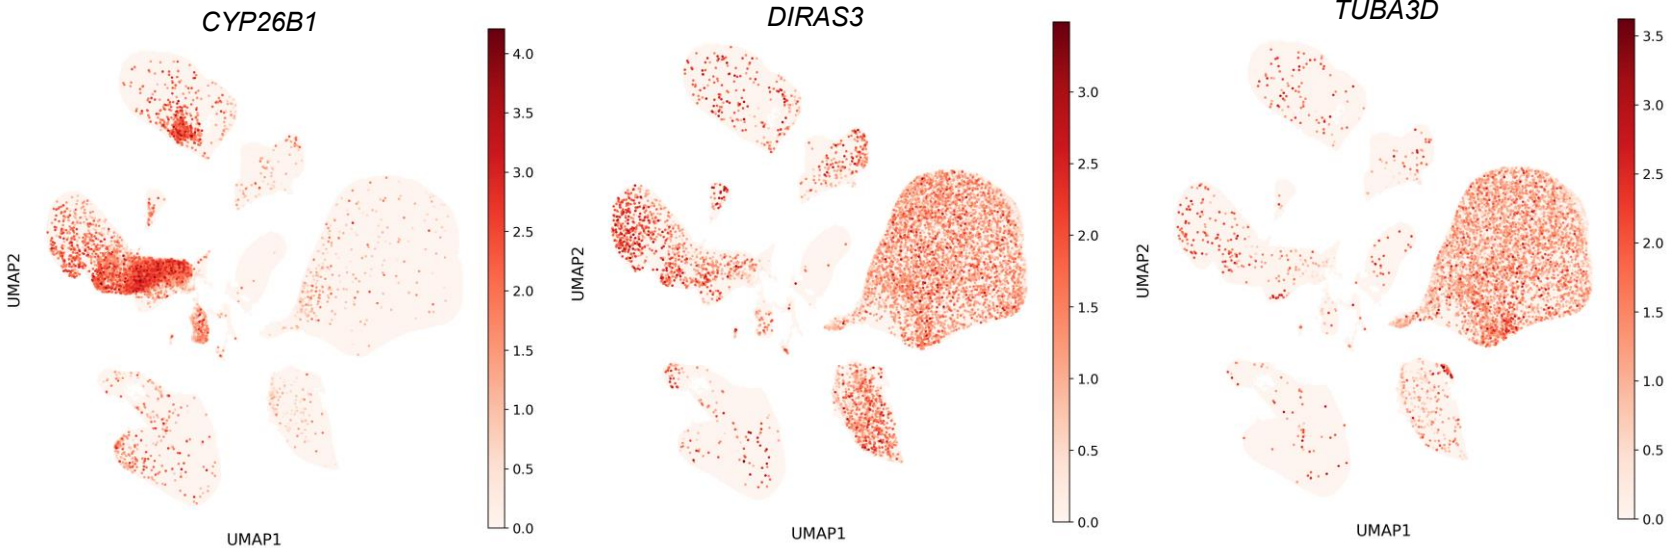

(c) The dot plot of candidate DEGs

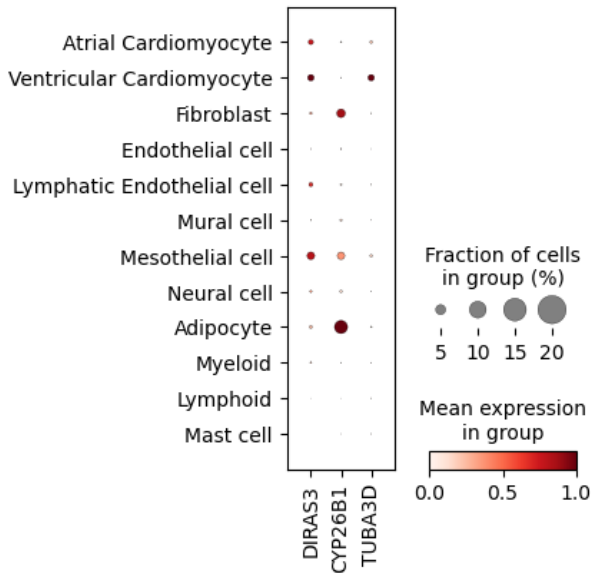

(d) The log-normalized expression of candidate DEGs

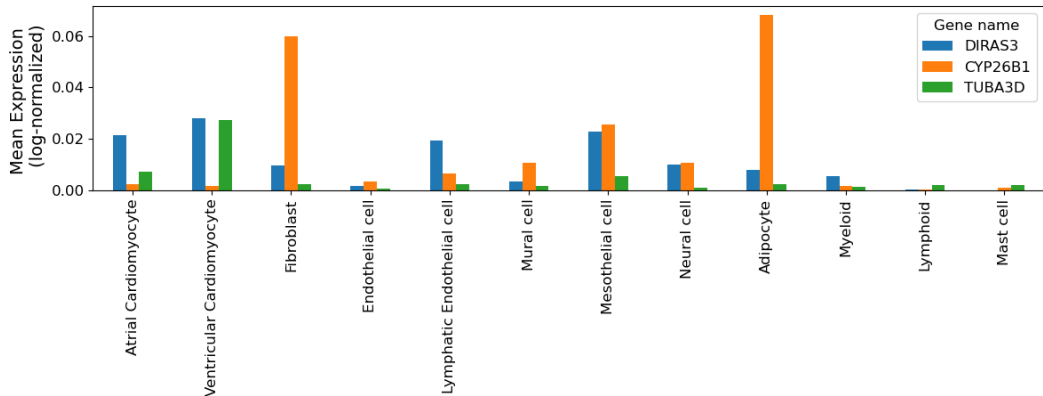

**Supplementary Figure 2:**  
**Expression Patterns of Candidate DEGs in Heart Cell Atlas**  
*CYP26B1* was predominantly expressed in fibroblasts, mesothelial cells, and adipocytes. *DIRAS3* is mainly expressed in both atrial and ventricular cardiomyocytes, as well as in lymphatic endothelial and mesothelial cells. *TUBA3D* expression was expressed in ventricular cardiomyocytes
