# Supplementary material for: RNA Sequence Analysis of Differentially Expressed Genes in Left Atrial Appendage Thrombus
Source: Research Square preprint supplement (doi:10.21203/rs.3.rs-6680046/v1), 2025-06-09
Supplement: Supplementary file 2 [file 40b52ba78e8a7581a296e4a4.xlsx]

## Sheet: Sheet1
Supplemental Table 2. Primer List
Ensembl Gene ID	Gene Symbol	Forward Primer	Reverse Primer
ENSG00000003137	CYP26B1	cgggaaggagatgaccatgc	taggccgcaaagatcagctc
ENSG00000162595	DIRAS3	acctgcataagttccccatcg	attccactccatcgcacagg
ENSG00000116690	PRG4	cgctgctttgagtccttcga	aggtggaggtgctttctttga
ENSG00000179914	ITLN1	gacgcccagaaaacagcatc	gaccctcattccagcacaca
ENSG00000075886	TUBA3D	gtgagactggagctggcaag	ggtggaagagctgcctgtag
ENSG00000096060	FKBP5	tttctccttgctgcctttctga	ggccttgtcacagcattcaaca
ENSG00000111640	GAPDH	gtctcctctgacttcaacagcg	accaccctgttgctgtagccaa
