# Supplementary material for: RNA Sequence Analysis of Differentially Expressed Genes in Left Atrial Appendage Thrombus
Source: Research Square preprint supplement (doi:10.21203/rs.3.rs-6680046/v1), 2025-06-09
Supplement: Supplementary file 2 [file ef404545e5361884e9da0003.pdf]

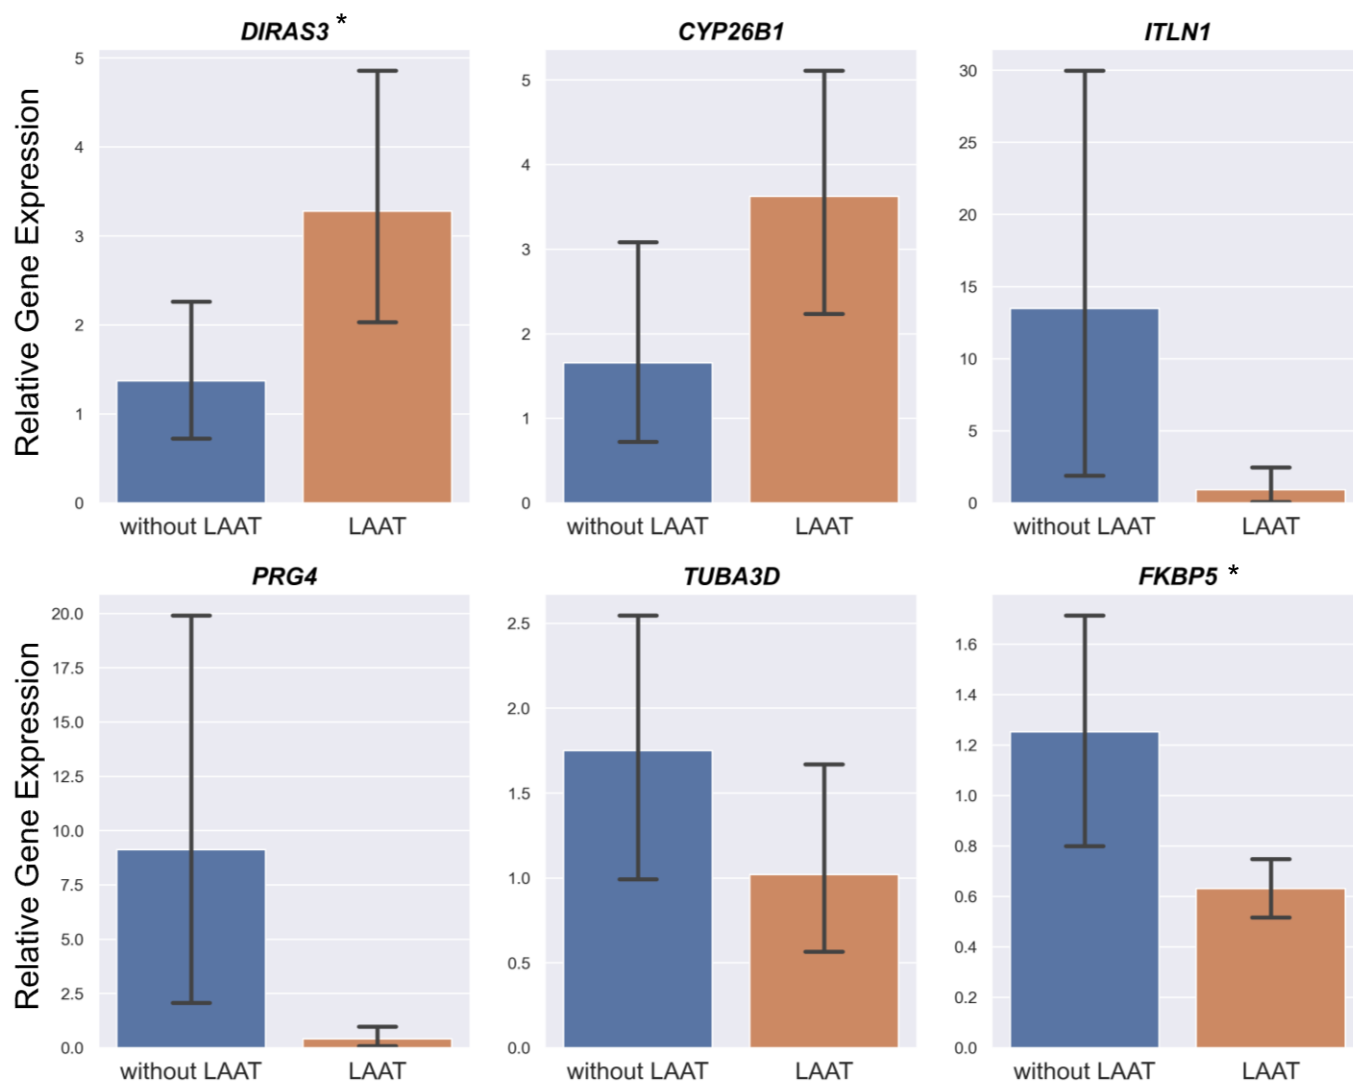

**Supplementary Figure 1**  
**Validation of RNA-seq Results by Quantitative PCR**  
**and in an Independent Sample Set**

The mean relative gene expression ratios (LAAT/without LAAT) were as follows: 2.19 for *DIRAS3*, 2.39 for *CYP26B1*, 0.068 for *ITLN1*, 0.045 for *PRG4*, 0.58 for *TUBA3D*, and 0.50 for *FKBP5*.

\*:  $P < 0.05$

LAAT: left atrial appendage thrombus
