# Supplementary material for: RNA Sequence Analysis of Differentially Expressed Genes in Left Atrial Appendage Thrombus
Source: Research Square preprint supplement (doi:10.21203/rs.3.rs-6680046/v1), 2025-06-09
Supplement: Supplementary file 3 [file 551b0a2af2e5ae690b6eab7e.xlsx]

## Sheet: Sheet1
Supplemental Table1. Patients characteristics
Samples	Age	gender (Male = 1, Female =2)	Type of atrial fibrillation	CHADS2 score	diseases/comorbidities	cardiac surgery
LAAT1	61	1	Persistent	3		Thoracoscopic stand-alone appendectomy
LAAT2	85	2	Persistent	2		Thoracoscopic stand-alone appendectomy
LAAT3	62	1	Persistent	5	cardiogenic cerebral infarction	Thoracoscopic stand-alone appendectomy
LAAT4	69	1	Persistent	2		Thoracoscopic stand-alone appendectomy
LAAT5	66	1	Persistent	3		Thoracoscopic stand-alone appendectomy
LAAT6	75	2	Persistent	5	cardiogenic cerebral infarction	Thoracoscopic stand-alone appendectomy
without LAAT1	70	2	Persistent	1	gastrointestinal bleeding	Thoracoscopic stand-alone appendectomy
without LAAT2	79	1	Paroxysmal	3	UAP	CABG, LAA excision
without LAAT3	51	1	Paroxysmal	3	OMI, MR	CABG, MVP, MAZE, LAA excision
without LAAT4	77	1	Paroxysmal	1	gastrointestinal bleeding	Thoracoscopic stand-alone appendectomy
without LAAT5	76	2	Paroxysmal	1	cardiogenic cerebral infarction	Thoracoscopic stand-alone appendectomy
LAAT: left atrial appendage thrombus, LAA: left atrial appendage, UAP: unstable angina pectoris, AF: atrial fibrillation, OMI: old myocardial infarction, MR: mitral regurgitation, MVP: mitral valve plasty
