# Supplementary material for: RNA Sequence Analysis of Differentially Expressed Genes in Left Atrial Appendage Thrombus
Source: Research Square preprint supplement (doi:10.21203/rs.3.rs-6680046/v1), 2025-06-09
Supplement: Supplementary file 4 [file 5bea8734f5f33717f5415853.xlsx]

## Sheet: Sheet1
Table 3. Hub genes
Ensembl Gene ID	Gene Symbol	logFC	logCPM	Regulation	nTPM in heart muscle	Degree	Betweenness	Pvalue	FDR
ENSG00000096060	FKBP5	-2.16	5.52	DOWN	90.5	75	9989.08	1.95e-06	0.00151
ENSG00000075886	TUBA3D	-3.57	1.51	DOWN	47.7	38	7993.42	1.99e-05	0.00871
GO: Gene ontology, BP: biological process, FC: fold change, CPM: count per milion, TPM: transcripts per million, FDR: false discovery rate
