# Supplementary material for: RNA Sequence Analysis of Differentially Expressed Genes in Left Atrial Appendage Thrombus
Source: Research Square preprint supplement (doi:10.21203/rs.3.rs-6680046/v1), 2025-06-09
Supplement: Supplementary file 5 [file 82f08b5bb3ca1b80a6a8e31e.xlsx]

## Sheet: Sheet1
eTable6. Linear regression of Fibrosis ratio and NTproBNP
Clinical items	DEGs	coef (95% CI)	pvalue
Fibrosis ratio	DIRAS3	2.99 (0.22 - 5.75)	0.0343
	ITLN1	-0.013 (-0.030 - 0.0049)	0.154
	PRG4	-0.041(-0.010 - 0.019)	0.182
	CLU	-0.056( -0.16 - 0.043)	0.268
	C4A	-0.25(-0.75 - 0.25)	0.323
	CYP26B1	0.60(-4.17 - 5.38)	0.804
NT-ProBNP	DIRAS3	373(238 - 507)	5.71e-08
	CYP26B1	349(23.8 - 674)	0.0355
	TUBA3D	-140(-272 - -8.81)	0.0379
	ITLN1	-1.25(-2.74 - 0.24)	0.0995
	FKBP5	-49.30(-102 - 3.72)	0.0684
DEG: differential expressed gene, CI: confidence interval linear regresion adjuseted age and gender
