# Supplementary material for: RNA Sequence Analysis of Differentially Expressed Genes in Left Atrial Appendage Thrombus
Source: Research Square preprint supplement (doi:10.21203/rs.3.rs-6680046/v1), 2025-06-09
Supplement: Supplementary file 6 [file 89503e97f73f985b6476283b.xlsx]

## Sheet: Sheet1
Table 2. Most significant DEGs
Ensembl Gene iD	Gene Symbol	logFC	logCPM	nTPM in heart tissue	P value	FDR
ENSG00000003137	CYP26B1	2.08	2.96	6	2.61e-08	6.41e-05
ENSG00000162595	DIRAS3	2.35	1.82	11.4	3.86e-08	7.89e-05
ENSG00000116690	PRG4	-6.62	7.75	18.7	6.12e-07	0.00073
ENSG00000179914	ITLN1	-6.8	7.67	125	6.21e-06	0.00381
DEG: differential expressed gene, GO: Gene ontlogy. CC: cellular component FC: fold change, CPM: count per milion, TPM: transcripts per million, FDR: false discovery rate
