# Supplementary material for: RNA Sequence Analysis of Differentially Expressed Genes in Left Atrial Appendage Thrombus
Source: Research Square preprint supplement (doi:10.21203/rs.3.rs-6680046/v1), 2025-06-09
Supplement: Supplementary file 7 [file 9d5791e195f70f5b5189e332.xlsx]

## Sheet: Sheet1
Supplemental Table 4. Detailed list of all differentially expressed genes
Ensembl Gene ID	Gene Symbol	logFC	logCPM	Regulation	nTPM in heart muscle	Pvalue	FDR
ENSG00000003137	CYP26B1	2.08	2.96	UP	6	2.61e-08	6.41e-05
ENSG00000162595	DIRAS3	2.35	1.82	UP	11.4	3.86e-08	7.89e-05
ENSG00000205364	MT1M	-2.58	0.784	DOWN	31.2	5.45e-09	3.13e-05
ENSG00000108551	RASD1	-2.77	4.63	DOWN	69.4	7.65e-09	3.13e-05
ENSG00000116690	PRG4	-6.62	7.75	DOWN	18.7	6.12e-07	0.00073
ENSG00000124920	MYRF	-4.14	2.55	DOWN	1.4	1.54e-06	0.00136
ENSG00000096060	FKBP5	-2.16	5.52	DOWN	90.5	1.95e-06	0.00151
ENSG00000187193	MT1X	-2.46	4.37	DOWN	364	1.98e-06	0.00151
ENSG00000124107	SLPI	-5.13	3.01	DOWN	38.4	4.78e-06	0.00309
ENSG00000179914	ITLN1	-6.8	7.67	DOWN	125	6.21e-06	0.00381
ENSG00000102934	PLLP	-2.25	1.55	DOWN	8.3	1.18e-05	0.00643
ENSG00000075886	TUBA3D	-3.57	1.51	DOWN	47.7	1.99e-05	0.00871
ENSG00000125730	C3	-2.77	7.77	DOWN	161	2.37e-05	0.00975
ENSG00000163347	CLDN1	-3.36	0.745	DOWN	1.5	2.57e-05	0.00975
ENSG00000106404	CLDN15	-2.97	2.65	DOWN	7.7	2.68e-05	0.00975
ENSG00000133048	CHI3L1	-2.7	0.391	DOWN	9.6	2.71e-05	0.00975
ENSG00000164764	SBSPON	-3.01	1.44	DOWN	1.6	2.8e-05	0.00975
ENSG00000103056	SMPD3	-3.1	1.22	DOWN	1.4	4.2e-05	0.0132
ENSG00000002587	HS3ST1	-2.03	1.68	DOWN	1.5	5.06e-05	0.0151
ENSG00000120057	SFRP5	-2.02	4.82	DOWN	41	9.73e-05	0.0234
ENSG00000243649	CFB	-2.68	2.54	DOWN	25.6	0.000101	0.0238
ENSG00000205038	PKHD1L1	-2.61	2.78	DOWN	5.3	0.000134	0.027
ENSG00000136052	SLC41A2	-2.57	1.05	DOWN	1.8	0.00015	0.0296
ENSG00000211892	IGHG4	-3.39	3.17	DOWN	19.3	0.000179	0.0322
ENSG00000106123	EPHB6	-2.28	2.09	DOWN	2.4	0.000185	0.0325
ENSG00000188257	PLA2G2A	-2.33	5.78	DOWN	90.5	0.000202	0.0334
ENSG00000088882	CPXM1	-3.03	2.18	DOWN	3.8	0.000326	0.0481
FC: fold change, CPM: count per milion, TPM: transcripts per million, FDR: false discovery rate
