# Supplementary material for: RNA Sequence Analysis of Differentially Expressed Genes in Left Atrial Appendage Thrombus
Source: Research Square preprint supplement (doi:10.21203/rs.3.rs-6680046/v1), 2025-06-09
Supplement: Supplementary file 8 [file b2566c70f812d407a4b5b0c8.xlsx]

## Sheet: Sheet1
eTable5: Correlation between DEGs and CHADS2 score
Clinical items	DEGs	spearman'r	P value
CHADS2 score	DIRAS3	0.529	0.0945
	CYP26B1	0.382	0.246
	C4A	-0.264	0.432
	CLU	-0.203	0.549
	ITLN1	-0.184	0.588
	PRG4	0.161	0.637
Heart failure	DIRAS3	0.657	0.0279
	CYP26B1	0.359	0.279
	CLU	-0.239	0.479
	PRG4	0.18	0.597
	ITLN1	0.0598	0.861
	C4A	0	1
Hypertension	CYP26B1	0.581	0.0609
	DIRAS3	0.516	0.104
	CLU	-0.323	0.333
	C4A	-0.258	0.443
	ITLN1	-0.194	0.568
	PRG4	-0.0647	0.85
Age ≥ 75	C4A	-0.452	0.163
	DIRAS3	-0.387	0.239
	ITLN1	0.258	0.443
	PRG4	-0.226	0.503
	CYP26B1	-0.194	0.568
	CLU	0	1
Diabetes	CLU	-0.289	0.389
	C4A	0.231	0.494
	CYP26B1	-0.173	0.611
	ITLN1	-0.173	0.611
	PRG4	0.0868	0.8
	DIRAS3	0.0577	0.866
Stroke	C4A	-0.516	0.104
	PRG4	0.194	0.567
	ITLN1	-0.194	0.568
	DIRAS3	0.194	0.568
	CYP26B1	0.0645	0.85
	CLU	0	1
