# Supplementary material for: RNA Sequence Analysis of Differentially Expressed Genes in Left Atrial Appendage Thrombus
Source: Research Square preprint supplement (doi:10.21203/rs.3.rs-6680046/v1), 2025-06-09
Supplement: Supplementary file 9 [file f767da98c520c105da728d8d.xlsx]

## Sheet: Sheet1
Table 1. Demographic data of study participants
Items	LAAT (n = 6)	without LAAT (n = 5)	P value
gender (Female)	2	2	1*
Persistent atrial fibrillation	6	1	0.015*
past history of stroke (No = 0, Yes = 1)	2	1	1*
medication of anticoagulant (No = 0, Yes = 1)	6	4	0.45*
Age	69.67 ± 9.07	70.6 ± 11.46	0.54†
Body mass index	23.68 ± 2.81	21.7 ± 1.21	0.33†
CHADS2 score	3.33 ± 1.37	1.80 ± 1.10	0.11†
White blood cell	7641.67 ± 3161.86	6490.00 ± 3290.81	0.54†
Neutrophil	5600.00 ± 3135.03	3620.00 ± 1478.21	0.43†
Lymphocyte	1575.00 ± 490.42	2382.00 ± 1724.3	0.93†
C-reactive protein	0.18 ± 0.2	0.15 ± 0.13	1†
Hemglobin	14.7 ± 1.38	12.2 ± 2.23	0.08†
Platelet	216.67 ± 48.72	238.2 ± 65.37	0.41†
Hemoglobin A1c	6.18 ± .58	6.22 ± 1.68	0.85†
Triglycerides	199.33 ± 73.36	129.8 ± 79.08	0.18†
Low density Lipoprotein cholestrol	99.5 ± 19.72	90.4 ± 11.15	0.27†
High density Lipoprotein cholestrol	53. ± 16.85	57.00 ± 23.44	0.93†
Blood urea nitorgen	18.58 ± 5.74	15.78 ± 4.57	0.46†
Creatinine	0.96 ± 0.29	0.83 ± 0.29	0.66†
eGFR	59.33 ± 18.15	66.6 ± 12.6	0.71†
NT-proBNP	1288.5 ± 667.79	346.00 ± 223.59	4.33E-03†
TTE EF	45.00 ± 17.41	54.00 ± 14.28	0.58†
LAA fibrosis ratio	14.94 ± 10.40	9.28 ± 3.01	0.66†
LAAT: left atrial appendage thrombus LAA: left atrial appendage, eGFR: estimated glomerular filtration rate, NT-proBNP: N-Terminal pro Brain Natriuretic Peptide, TTE: trans thoratic echocardography, EF: ejection fraction, LA: left atrial * fisher's exact test, † mann-whitney U test
